# Supplementary material for: Poor reporting of multivariable prediction model studies: towards a targeted implementation strategy of the TRIPOD statement
Source: Springer Nature journal article supplement (doi:10.1186/s12916-018-1099-2), 2018-07-16
Supplement: MOESM1 [file 15964244]

## Journal selection

Ten journals with the highest Journal Impact Factor within each of 37 categories (clinical domains) (2012 Journal Citation Reports® [Clarivate Analytics, 2017]) that were selected.

Full journal titles indicated with an \* were included in more than one category.

| Category (clinical domain)         | Full journal title                                 | Journal Impact Factor |
|------------------------------------|----------------------------------------------------|-----------------------|
| Allergy                            | Journal of Allergy and Clinical Immunology*        | 12.047                |
|                                    | Allergy                                            | 5.883                 |
|                                    | Clinical Reviews in Allergy & Immunology           | 5.590                 |
|                                    | Clinical and Experimental Allergy                  | 4.789                 |
|                                    | Annals of Allergy Asthma & Immunology              | 3.449                 |
|                                    | Current Opinion In Allergy and Clinical Immunology | 3.398                 |
|                                    | Pediatric Allergy and Immunology*                  | 3.376                 |
|                                    | Contact Dermatitis*                                | 2.925                 |
|                                    | Current Allergy and Asthma Reports                 | 2.746                 |
|                                    | Allergy Asthma & Immunology Research               | 2.653                 |
| Anesthesiology                     | Pain                                               | 5.644                 |
|                                    | Anesthesiology                                     | 5.163                 |
|                                    | British Journal of Anaesthesia                     | 4.237                 |
|                                    | Anaesthesia                                        | 3.486                 |
|                                    | Regional Anesthesia and Pain Medicine              | 3.464                 |
|                                    | Anesthesia and Analgesia                           | 3.300                 |
|                                    | European Journal of Pain                           | 3.067                 |
|                                    | Minerva Anestesiologica*                           | 2.818                 |
|                                    | European Journal of Anaesthesiology                | 2.792                 |
|                                    | Pain Practice                                      | 2.605                 |
| Cardiac and cardiovascular systems | Circulation*                                       | 15.202                |
|                                    | European Heart Journal                             | 14.097                |
|                                    | Journal of the American College of Cardiology      | 14.086                |
|                                    | Circulation Research*                              | 11.861                |
|                                    | Nature Reviews Cardiology                          | 10.400                |
|                                    | Circulation-Cardiovascular Genetics                | 6.728                 |
|                                    | Circulation-Heart Failure                          | 6.684                 |
|                                    | Jacc-Cardiovascular Interventions                  | 6.552                 |
|                                    | Circulation-Cardiovascular Interventions           | 6.543                 |
|                                    | Jacc-Cardiovascular Imaging*                       | 6.164                 |
| Clinical neurology                 | Lancet Neurology                                   | 23.917                |
|                                    | Nature Reviews Neurology                           | 15.518                |
|                                    | Alzheimers & Dementia                              | 14.483                |
|                                    | Annals of Neurology                                | 11.193                |
|                                    | Brain                                              | 9.915                 |
|                                    | Acta Neuropathologica                              | 9.734                 |
|                                    | Sleep Medicine Reviews                             | 8.681                 |

|                                    |                                                                   |        |
|------------------------------------|-------------------------------------------------------------------|--------|
|                                    | Neurology                                                         | 8.249  |
|                                    | Archives of Neurology                                             | 7.685  |
|                                    | Neuro-Oncology                                                    | 6.180  |
| Critical care medicine             | American Journal of Respiratory and Critical Care Medicine*       | 11.041 |
|                                    | Critical Care Medicine                                            | 6.124  |
|                                    | Chest*                                                            | 5.854  |
|                                    | Intensive Care Medicine                                           | 5.258  |
|                                    | Critical Care                                                     | 4.718  |
|                                    | Journal of Neurotrauma                                            | 4.295  |
|                                    | Resuscitation*                                                    | 4.104  |
|                                    | Neurocritical Care                                                | 3.038  |
|                                    | Current Opinion In Critical Care                                  | 2.967  |
|                                    | Minerva Anestesiologica*                                          | 2.818  |
| Dentistry. Oral surgery & medicine | Periodontology 2000                                               | 4.012  |
|                                    | Journal of Dental Research                                        | 3.826  |
|                                    | Clinical Implant Dentistry and Related Research                   | 3.821  |
|                                    | Dental Materials                                                  | 3.773  |
|                                    | Journal of Clinical Periodontology                                | 3.688  |
|                                    | Clinical Oral Implants Research                                   | 3.433  |
|                                    | Journal of Dentistry                                              | 3.200  |
|                                    | Journal of Endodontics                                            | 2.929  |
|                                    | International Journal of Oral Science                             | 2.719  |
|                                    | British Journal of Oral & Maxillofacial Surgery                   | 2.717  |
| Dermatology                        | Journal of Investigative Dermatology                              | 6.193  |
|                                    | Pigment Cell & Melanoma Research                                  | 5.839  |
|                                    | Journal of the American Academy of Dermatology                    | 4.906  |
|                                    | Archives of Dermatology                                           | 4.792  |
|                                    | British Journal of Dermatology                                    | 3.759  |
|                                    | Experimental Dermatology                                          | 3.578  |
|                                    | Journal of Dermatological Science                                 | 3.520  |
|                                    | Acta Dermato-Venereologica                                        | 3.487  |
|                                    | Contact Dermatitis*                                               | 2.925  |
|                                    | Skin Pharmacology and Physiology                                  | 2.885  |
| Emergency medicine                 | Annals of Emergency Medicine                                      | 4.285  |
|                                    | Resuscitation*                                                    | 4.104  |
|                                    | Emergencias                                                       | 2.578  |
|                                    | Journal of Trauma-Injury Infection and Critical Care              | 2.348  |
|                                    | Injury-International Journal of the Care of the Injured           | 2.174  |
|                                    | Prehospital Emergency Care                                        | 1.859  |
|                                    | Academic Emergency Medicine                                       | 1.757  |
|                                    | American Journal of Emergency Medicine                            | 1.704  |
|                                    | Scandinavian Journal of Trauma Resuscitation & Emergency Medicine | 1.680  |
|                                    | Emergency Medicine Journal                                        | 1.645  |
| Endocrinology & Metabolism         | Endocrine Reviews                                                 | 14.873 |

|                               |                                                                           |        |
|-------------------------------|---------------------------------------------------------------------------|--------|
|                               | Cell Metabolism                                                           | 14.619 |
|                               | Nature Reviews Endocrinology                                              | 11.025 |
|                               | Trends In Endocrinology and Metabolism                                    | 8.901  |
|                               | Frontiers In Neuroendocrinology                                           | 7.985  |
|                               | Diabetes                                                                  | 7.895  |
|                               | Diabetes Care                                                             | 7.735  |
|                               | Journal of Mammary Gland Biology and Neoplasia                            | 7.524  |
|                               | Journal of Pineal Research                                                | 7.304  |
|                               | Antioxidants & Redox Signaling                                            | 7.189  |
| Gastroenterology & Hepatology | Gastroenterology                                                          | 12.821 |
|                               | Hepatology                                                                | 12.003 |
|                               | Gut                                                                       | 10.732 |
|                               | Nature Reviews Gastroenterology & Hepatology                              | 10.426 |
|                               | Journal of Hepatology                                                     | 9.858  |
|                               | Seminars In Liver Disease                                                 | 8.274  |
|                               | American Journal of Gastroenterology                                      | 7.553  |
|                               | Clinical Gastroenterology and Hepatology                                  | 6.648  |
|                               | Endoscopy*                                                                | 5.735  |
|                               | Gastrointestinal Endoscopy                                                | 5.210  |
| Geriatrics & Gerontology      | Neurobiology of Aging                                                     | 6.166  |
|                               | Ageing Research Reviews                                                   | 5.953  |
|                               | Aging Cell                                                                | 5.705  |
|                               | Journal of the American Medical Directors Association                     | 5.302  |
|                               | Frontiers In Aging Neuroscience                                           | 5.224  |
|                               | Journals of Gerontology Series A-Biological Sciences and Medical Sciences | 4.314  |
|                               | American Journal of Geriatric Psychiatry                                  | 4.131  |
|                               | Age                                                                       | 4.084  |
|                               | Journal of the American Geriatrics Society                                | 3.978  |
|                               | Experimental Gerontology                                                  | 3.911  |
| Hematology                    | Circulation Research*                                                     | 11.861 |
|                               | Leukemia*                                                                 | 10.164 |
|                               | Blood                                                                     | 9.060  |
|                               | Stem Cells                                                                | 7.701  |
|                               | Arteriosclerosis Thrombosis and Vascular Biology*                         | 6.338  |
|                               | Thrombosis and Haemostasis*                                               | 6.094  |
|                               | Journal of Thrombosis and Haemostasis*                                    | 6.081  |
|                               | Blood Reviews                                                             | 6.000  |
|                               | Haematologica-the Hematology Journal                                      | 5.935  |
|                               | Journal of Cerebral Blood Flow and Metabolism                             | 5.398  |
| Immunology                    | Annual Review of Immunology                                               | 36.556 |
|                               | Nature Reviews Immunology                                                 | 33.129 |
|                               | Nature Immunology                                                         | 26.199 |
|                               | Immunity                                                                  | 19.795 |
|                               | Journal of Experimental Medicine                                          | 13.214 |

|                                      |                                                        |        |
|--------------------------------------|--------------------------------------------------------|--------|
|                                      | Immunological Reviews                                  | 12.155 |
|                                      | Journal of Allergy and Clinical Immunology*            | 12.047 |
|                                      | Trends In Immunology                                   | 9.486  |
|                                      | Clinical Infectious Diseases*                          | 9.374  |
|                                      | Current Opinion In Immunology                          | 8.771  |
| Infectious diseases                  | Lancet Infectious Diseases                             | 19.966 |
|                                      | Clinical Infectious Diseases*                          | 9.374  |
|                                      | Aids                                                   | 6.407  |
|                                      | Emerging Infectious Diseases                           | 5.993  |
|                                      | Journal of Infectious Diseases                         | 5.848  |
|                                      | Eurosurveillance                                       | 5.491  |
|                                      | Journal of Antimicrobial Chemotherapy                  | 5.338  |
|                                      | Current Opinion In Infectious Diseases                 | 4.870  |
|                                      | Current Opinion In Hiv and Aids                        | 4.704  |
|                                      | J aids-Journal of Acquired Immune Deficiency Syndromes | 4.653  |
| Integrative & complementary medicine | Alternative Medicine Review                            | 4.857  |
|                                      | Phytomedicine                                          | 2.972  |
|                                      | Journal of Ethnopharmacology                           | 2.755  |
|                                      | Integrative Cancer therapies                           | 2.354  |
|                                      | American Journal of Chinese Medicine                   | 2.281  |
|                                      | Complementary therapies In Medicine                    | 2.093  |
|                                      | Bmc Complementary and Alternative Medicine             | 2.082  |
|                                      | Evidence-Based Complementary and Alternative Medicine  | 1.722  |
|                                      | Journal of Manipulative and Physiological therapeutics | 1.647  |
|                                      | Journal of Alternative and Complementary Medicine      | 1.464  |
| Medical laboratory technology        | Clinical Chemistry                                     | 7.149  |
|                                      | Critical Reviews In Clinical Laboratory Sciences       | 3.783  |
|                                      | Advances In Clinical Chemistry                         | 3.674  |
|                                      | Translational Research                                 | 3.490  |
|                                      | Clinical Chemistry and Laboratory Medicine             | 3.009  |
|                                      | Clinica Chimica Acta                                   | 2.850  |
|                                      | Archives of Pathology & Laboratory Medicine            | 2.781  |
|                                      | Clinical Biochemistry                                  | 2.450  |
|                                      | Therapeutic Drug Monitoring                            | 2.234  |
|                                      | Cytometry Part B-Clinical Cytometry                    | 2.231  |
| Medicine. general & internal         | New England Journal of Medicine                        | 51.658 |
|                                      | Lancet                                                 | 39.060 |
|                                      | Jama-Journal of the American Medical Association       | 29.978 |
|                                      | British Medical Journal                                | 17.215 |
|                                      | Plos Medicine                                          | 15.253 |
|                                      | Annals of Internal Medicine                            | 13.976 |
|                                      | Archives of Internal Medicine                          | 10.579 |
|                                      | Bmc Medicine                                           | 6.679  |
|                                      | Canadian Medical Association Journal                   | 6.465  |

|                         |                                                                             |         |
|-------------------------|-----------------------------------------------------------------------------|---------|
|                         | Journal of Internal Medicine                                                | 6.455   |
| Obstetrics & Gynecology | Human Reproduction Update*                                                  | 8.847   |
|                         | Obstetrics and Gynecology                                                   | 4.798   |
|                         | Human Reproduction*                                                         | 4.670   |
|                         | Fertility and Sterility*                                                    | 4.174   |
|                         | Gynecologic Oncology                                                        | 3.929   |
|                         | American Journal of Obstetrics and Gynecology                               | 3.877   |
|                         | Bjog-An International Journal of Obstetrics and Gynaecology                 | 3.760   |
|                         | Ultrasound In Obstetrics & Gynecology                                       | 3.557   |
|                         | Seminars In Reproductive Medicine*                                          | 3.211   |
|                         | Menopause-the Journal of the North American Menopause Society               | 3.163   |
| Oncology                | Ca-A Cancer Journal For Clinicians                                          | 153.459 |
|                         | Nature Reviews Cancer                                                       | 35.000  |
|                         | Lancet Oncology                                                             | 25.117  |
|                         | Cancer Cell                                                                 | 24.755  |
|                         | Journal of Clinical Oncology                                                | 18.038  |
|                         | Nature Reviews Clinical Oncology                                            | 15.031  |
|                         | Jnci-Journal of the National Cancer Institute                               | 14.336  |
|                         | Leukemia*                                                                   | 10.164  |
|                         | Cancer Discovery                                                            | 10.143  |
|                         | Biochimica Et Biophysica Acta-Reviews On Cancer                             | 9.033   |
| Ophthalmology           | Progress In Retinal and Eye Research                                        | 9.439   |
|                         | Ophthalmology                                                               | 5.563   |
|                         | Archives of Ophthalmology                                                   | 3.826   |
|                         | American Journal of Ophthalmology                                           | 3.631   |
|                         | Investigative Ophthalmology & Visual Science                                | 3.441   |
|                         | Experimental Eye Research                                                   | 3.026   |
|                         | Survey of Ophthalmology                                                     | 2.859   |
|                         | Retina-the Journal of Retinal and Vitreous Diseases                         | 2.825   |
|                         | British Journal of Ophthalmology                                            | 2.725   |
| Ocular Surface          | 2.643                                                                       |         |
| Orthopedics             | American Journal of Sports Medicine*                                        | 4.439   |
|                         | Osteoarthritis and Cartilage*                                               | 4.262   |
|                         | Journal of Bone and Joint Surgery-American Volume                           | 3.234   |
|                         | Spine Journal                                                               | 3.220   |
|                         | Arthroscopy-the Journal of Arthroscopic and Related Surgery                 | 3.103   |
|                         | Journal of Orthopaedic & Sports Physical therapy*                           | 2.947   |
|                         | Journal of Orthopaedic Research                                             | 2.875   |
|                         | Clinical Orthopaedics and Related Research                                  | 2.787   |
|                         | Physical therapy*                                                           | 2.778   |
| Acta Orthopaedica       | 2.736                                                                       |         |
| Otorhinolaryngology     | Ear and Hearing                                                             | 3.262   |
|                         | Jaro-Journal of the Association For Research In Otolaryngology              | 2.952   |
|                         | Head and Neck-Journal For the Sciences and Specialties of the Head and Neck | 2.833   |

|                             |                                                                     |        |
|-----------------------------|---------------------------------------------------------------------|--------|
|                             | Hearing Research                                                    | 2.537  |
|                             | Audiology and Neuro-Otology                                         | 2.318  |
|                             | Otology & Neurotology                                               | 2.014  |
|                             | Laryngoscope                                                        | 1.979  |
|                             | Dysphagia                                                           | 1.938  |
|                             | Clinical Otolaryngology                                             | 1.869  |
|                             | Archives of Otolaryngology-Head & Neck Surgery                      | 1.779  |
| Pediatrics                  | Journal of the American Academy of Child and Adolescent Psychiatry* | 6.970  |
|                             | Pediatrics                                                          | 5.119  |
|                             | Archives of Pediatrics & Adolescent Medicine                        | 4.282  |
|                             | Journal of Pediatrics                                               | 4.035  |
|                             | European Child & Adolescent Psychiatry                              | 3.699  |
|                             | Pediatric Infectious Disease Journal                                | 3.569  |
|                             | Seminars In Fetal & Neonatal Medicine                               | 3.505  |
|                             | Archives of Disease In Childhood-Fetal and Neonatal Edition         | 3.451  |
|                             | Pediatric Allergy and Immunology*                                   | 3.376  |
|                             | Archives of Disease In Childhood                                    | 3.051  |
| Peripheral vascular disease | Circulation*                                                        | 15.202 |
|                             | Circulation Research*                                               | 11.861 |
|                             | Hypertension                                                        | 6.873  |
|                             | Arteriosclerosis Thrombosis and Vascular Biology*                   | 6.338  |
|                             | Stroke                                                              | 6.158  |
|                             | Thrombosis and Haemostasis*                                         | 6.094  |
|                             | Journal of Thrombosis and Haemostasis*                              | 6.081  |
|                             | Current Opinion In Lipidology                                       | 5.839  |
|                             | Atherosclerosis Supplements                                         | 4.333  |
|                             | Seminars In Thrombosis and Hemostasis                               | 4.216  |
| Primary health care         | Annals of Family Medicine                                           | 4.613  |
|                             | Primary Care Respiratory Journal                                    | 2.191  |
|                             | British Journal of General Practice                                 | 2.034  |
|                             | Scandinavian Journal of Primary Health Care                         | 1.905  |
|                             | Family Practice                                                     | 1.828  |
|                             | Canadian Family Physician                                           | 1.808  |
|                             | Journal of the American Board of Family Medicine                    | 1.758  |
|                             | American Family Physician                                           | 1.611  |
|                             | Bmc Family Practice                                                 | 1.609  |
|                             | Primary Care Diabetes                                               | 1.609  |
| Psychiatry                  | Molecular Psychiatry                                                | 14.897 |
|                             | American Journal of Psychiatry                                      | 14.721 |
|                             | Archives of General Psychiatry                                      | 13.772 |
|                             | Biological Psychiatry                                               | 9.247  |
|                             | World Psychiatry                                                    | 8.974  |
|                             | Neuropsychopharmacology                                             | 8.678  |
|                             | Schizophrenia Bulletin                                              | 8.486  |

|                                                 |                                                                     |        |
|-------------------------------------------------|---------------------------------------------------------------------|--------|
|                                                 | Psychotherapy and Psychosomatics                                    | 7.230  |
|                                                 | Journal of the American Academy of Child and Adolescent Psychiatry* | 6.970  |
|                                                 | British Journal of Psychiatry                                       | 6.606  |
| Public. Environmental and Occupational health   | Epidemiologic Reviews                                               | 9.269  |
|                                                 | Environmental Health Perspectives                                   | 7.260  |
|                                                 | International Journal of Epidemiology                               | 6.982  |
|                                                 | Who Technical Report Series                                         | 6.100  |
|                                                 | Epidemiology                                                        | 5.738  |
|                                                 | Journal of Clinical Epidemiology                                    | 5.332  |
|                                                 | Bulletin of the World Health Organization                           | 5.250  |
|                                                 | European Journal of Epidemiology                                    | 5.118  |
|                                                 | American Journal of Epidemiology                                    | 4.780  |
|                                                 | Cancer Epidemiology Biomarkers & Prevention                         | 4.559  |
| Radiology. Nuclear medicine and Medical imaging | Human Brain Mapping                                                 | 6.878  |
|                                                 | Radiology                                                           | 6.339  |
|                                                 | Neuroimage                                                          | 6.252  |
|                                                 | Jacc-Cardiovascular Imaging*                                        | 6.164  |
|                                                 | Circulation-Cardiovascular Imaging                                  | 5.795  |
|                                                 | Journal of Nuclear Medicine                                         | 5.774  |
|                                                 | Investigative Radiology                                             | 5.460  |
|                                                 | European Journal of Nuclear Medicine and Molecular Imaging          | 5.114  |
|                                                 | International Journal of Radiation Oncology Biology Physics         | 4.524  |
|                                                 | Radiotherapy and Oncology                                           | 4.520  |
| Rehabilitation                                  | Journal of Head Trauma Rehabilitation                               | 4.443  |
|                                                 | Neurorehabilitation and Neural Repair                               | 4.278  |
|                                                 | Ieee Transactions On Neural Systems and Rehabilitation Engineering  | 3.255  |
|                                                 | Journal of Orthopaedic & Sports Physical therapy*                   | 2.947  |
|                                                 | Physical therapy*                                                   | 2.778  |
|                                                 | Supportive Care In Cancer                                           | 2.649  |
|                                                 | Journal of Neuroengineering and Rehabilitation                      | 2.567  |
|                                                 | American Journal of Speech-Language Pathology                       | 2.448  |
|                                                 | Archives of Physical Medicine and Rehabilitation                    | 2.358  |
|                                                 | Journal of Physiotherapy                                            | 2.255  |
| Reproductive biology                            | Human Reproduction Update*                                          | 8.847  |
|                                                 | Human Reproduction*                                                 | 4.670  |
|                                                 | Molecular Human Reproduction                                        | 4.542  |
|                                                 | Fertility and Sterility*                                            | 4.174  |
|                                                 | Biology of Reproduction                                             | 4.027  |
|                                                 | Reproduction                                                        | 3.555  |
|                                                 | American Journal of Reproductive Immunology                         | 3.317  |
|                                                 | Seminars In Reproductive Medicine*                                  | 3.211  |
|                                                 | Reproductive Toxicology                                             | 3.141  |
|                                                 | Placenta                                                            | 3.117  |
| Respiratory system                              | American Journal of Respiratory and Critical Care Medicine*         | 11.041 |

|                 |                                                                       |       |
|-----------------|-----------------------------------------------------------------------|-------|
|                 | Thorax                                                                | 8.376 |
|                 | European Respiratory Journal                                          | 6.355 |
|                 | Chest*                                                                | 5.854 |
|                 | Journal of Heart and Lung Transplantation*                            | 5.112 |
|                 | Journal of Thoracic Oncology                                          | 4.473 |
|                 | American Journal of Respiratory Cell and Molecular Biology            | 4.148 |
|                 | Respiratory Research                                                  | 3.642 |
|                 | Journal of Thoracic and Cardiovascular Surgery                        | 3.526 |
|                 | American Journal of Physiology-Lung Cellular and Molecular Physiology | 3.523 |
| Rheumatology    | Nature Reviews Rheumatology                                           | 9.745 |
|                 | Annals of the Rheumatic Diseases                                      | 9.111 |
|                 | Arthritis and Rheumatism                                              | 7.477 |
|                 | Current Opinion In Rheumatology                                       | 5.191 |
|                 | Arthritis Research & therapy                                          | 4.302 |
|                 | Osteoarthritis and Cartilage*                                         | 4.262 |
|                 | Rheumatology                                                          | 4.212 |
|                 | Seminars In Arthritis and Rheumatism                                  | 3.806 |
|                 | Arthritis Care & Research                                             | 3.731 |
|                 | Best Practice & Research In Clinical Rheumatology                     | 3.550 |
| Sport sciences  | Exercise Immunology Review                                            | 7.053 |
|                 | Exercise and Sport Sciences Reviews                                   | 5.283 |
|                 | Sports Medicine                                                       | 5.237 |
|                 | Medicine and Science In Sports and Exercise                           | 4.475 |
|                 | American Journal of Sports Medicine*                                  | 4.439 |
|                 | British Journal of Sports Medicine                                    | 3.668 |
|                 | Journal of Applied Physiology                                         | 3.484 |
|                 | Scandinavian Journal of Medicine & Science In Sports                  | 3.214 |
|                 | Journal of Orthopaedic & Sports Physical therapy*                     | 2.947 |
|                 | Journal of Science and Medicine In Sport                              | 2.899 |
| Surgery         | Annals of Surgery                                                     | 6.329 |
|                 | American Journal of Transplantation*                                  | 6.192 |
|                 | Endoscopy*                                                            | 5.735 |
|                 | Journal of Neurology Neurosurgery and Psychiatry                      | 4.924 |
|                 | American Journal of Surgical Pathology                                | 4.868 |
|                 | British Journal of Surgery                                            | 4.839 |
|                 | Journal of the American College of Surgeons                           | 4.500 |
|                 | Surgery For Obesity and Related Diseases                              | 4.121 |
|                 | Annals of Surgical Oncology                                           | 4.120 |
|                 | Archives of Surgery                                                   | 4.100 |
| Transplantation | American Journal of Transplantation*                                  | 6.192 |
|                 | Journal of Heart and Lung Transplantation*                            | 5.112 |
|                 | Stem Cells and Development                                            | 4.670 |
|                 | Cell Transplantation                                                  | 4.422 |
|                 | Liver Transplantation                                                 | 3.944 |



|                      |                                                                    |        |
|----------------------|--------------------------------------------------------------------|--------|
|                      | Biology of Blood and Marrow Transplantation                        | 3.940  |
|                      | Transplantation                                                    | 3.781  |
|                      | Bone Marrow Transplantation                                        | 3.541  |
|                      | Nephrology Dialysis Transplantation                                | 3.371  |
|                      | Current Opinion In Organ Transplantation                           | 3.272  |
| Tropical medicine    | Plos Neglected Tropical Diseases                                   | 4.569  |
|                      | Malaria Journal                                                    | 3.400  |
|                      | Tropical Medicine & International Health                           | 2.938  |
|                      | Acta Tropica                                                       | 2.787  |
|                      | American Journal of Tropical Medicine and Hygiene                  | 2.534  |
|                      | Transactions of the Royal Society of Tropical Medicine and Hygiene | 1.823  |
|                      | Memorias Do Instituto Oswaldo Cruz                                 | 1.363  |
|                      | Annals of Tropical Medicine and Parasitology                       | 1.313  |
|                      | Journal of Vector Borne Diseases                                   | 1.041  |
|                      | Journal of Tropical Pediatrics                                     | 1.006  |
| Urology & Nephrology | European Urology                                                   | 10.476 |
|                      | Journal of the American Society of Nephrology                      | 8.987  |
|                      | Nature Reviews Nephrology                                          | 7.943  |
|                      | Kidney International                                               | 7.916  |
|                      | American Journal of Kidney Diseases                                | 5.294  |
|                      | Clinical Journal of the American Society of Nephrology             | 5.068  |
|                      | Nature Reviews Urology                                             | 4.793  |
|                      | Current Opinion In Nephrology and Hypertension                     | 3.964  |
|                      | Prostate                                                           | 3.843  |
|                      | Journal of Urology                                                 | 3.696  |
